# Supplementary material for: Human monocyte-derived type 1 and 2 macrophages recognize Ara h 1, a major peanut allergen, by different mechanisms
Source: PubMed Central journal article supplement (PMC8115286; doi:10.1038/s41598-021-89402-1), 2021-05-12
Supplement: 41598_2021_89402_MOESM1_ESM.pdf [file 41598_2021_89402_MOESM1_ESM.pdf]

Supporting information

**Human monocyte-derived type 1 and 2 macrophages recognize Ara h 1, a major peanut allergen, by different mechanisms**

Maren Krause<sup>1</sup>, Peter Crauwels<sup>2,3</sup>, Frank Blanco<sup>1</sup>, Martin Globisch<sup>4</sup>, Andrea Wangorsch<sup>1</sup>, Thomas Henle<sup>4</sup>, Jonas Lidholm<sup>5</sup>, Ger van Zandbergen<sup>2,6,7</sup>, Stefan Vieths<sup>1</sup>, Stephan Scheurer<sup>1</sup>, Masako Toda<sup>1,8,\*</sup>

<sup>1</sup> VPr1 Research Group “Molecular Allergology“, Paul-Ehrlich-Institut, Langen, Germany.

<sup>2</sup> Division of Immunology, Paul-Ehrlich-Institut, Langen, Germany.

<sup>3</sup> Institute of Microbiology and Biotechnology, University of Ulm, Ulm, Germany.

<sup>4</sup> Institute of Food Chemistry, Technical University Dresden, Dresden, Germany.

<sup>5</sup> Thermo Fisher Scientific, Uppsala, Sweden.

<sup>6</sup> Institute for Immunology, University Medical Center, Johannes Gutenberg University Mainz, Mainz, Germany.

<sup>7</sup> Research Center for Immunotherapy (FZI), University Medical Center, Johannes Gutenberg-University Mainz, Mainz, Germany.

<sup>8</sup> Laboratory of Food and Biomolecular Science, Graduate School of Agricultural Science, Tohoku University, Sendai, Japan.

\*Corresponding author

Dr. Masako Toda

Laboratory of Food and Biomolecular Science,

Graduate School of Agricultural Science, Tohoku University, Sendai, Japan.

E-mail: [masako.toda.a7@tohoku.ac.jp](mailto:masako.toda.a7@tohoku.ac.jp)

## **Abbreviations**

Ac-LDL: acetylated low-density lipoprotein

APC: antigen presenting cells

DC: dendritic cells

DC-SIGN: dendritic cell-specific intercellular adhesion molecule-3-grabbing non-integrin

hMDDC: human primary monocyte derived dendritic cells

hMDM1: human primary monocyte derived macrophages type 1

hMDM2: human primary monocyte derived macrophages type 2

LPS: lipopolysaccharides

mAb: monoclonal antibody

nAra h 1: natural Ara h 1

PPRs: pattern recognition receptors

rAra h 1: recombinant Ara h 1

SR-AI: scavenger receptor class A type I

TLR4: Toll-like receptor 4

## **Materials and Methods**

### **Generation of human monocyte derived dendritic cells (hMDDC)**

Buffy coats obtained from anonymous healthy blood donors were purchased from the German Red Cross Blood Donor Service Baden-Württemberg & Hessen. Human peripheral mononuclear cells were isolated from the buffy coats by passage over a Leukocyte Separation Medium (PAA Laboratories GmbH) gradient. Monocytes were isolated by CD14 positive selection (Miltenyi Biotec GmbH) and differentiated into hMDDC by the addition of 10 ng/mL recombinant human GM-CSF (R&D Systems) and recombinant human IL-4 (Peprotech) for 5 to 7 days<sup>1</sup>.

### **Assessment of receptor expression by FACS**

hMDM1, hMDM2 and hMDDC were treated with human Fc block and stained with phycoerythrin (PE)-conjugated anti-human CD36, anti-human SR-AI (CD204), anti-human mannose receptor (CD206), anti-human DC-SIGN (CD209), anti-human mincle, or anti-human Dectin-1 mAb. Antibodies used for this experiment were purchased from Thermo Fisher Scientific.

### **Binding analysis of nAra h 1 to Toll-like receptor 4 (TLR4)**

HEK-Dual™ human TLR4 (NF/IL8) cells (InvivoGen) were stimulated with various concentrations of nAra h 1 or LPS for 20 hours. The concentrations of IL-8 in the culture supernatant were measured by ELISA (Peprotech) as an indication of TLR4 engagement.

## **Reference**

1. Filippis, C., Arens, K., Noubissi Nzetou, GA., et al., Anti-Tumor Necrosis Factor  $\alpha$  Therapeutics Differentially Affect Leishmania Infection of Human Macrophages. *Front. Immunol.* **8**, 1880. <https://doi.org/10.3389/fimmu.2017.01880>. (2017)

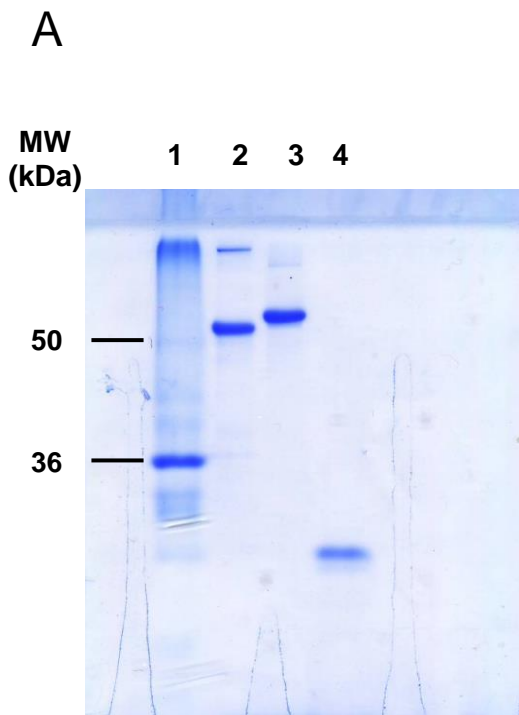

Lane 1 Size marker  
 Lane 2 nAra h 1  
 Lane 3 rAra h 1  
 Lane 4 rAra h 2

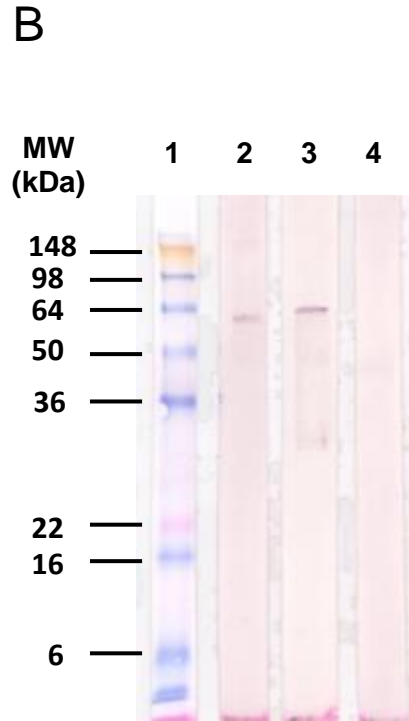

Lane 1 Size marker  
 Lane 2 nAra h 1  
 Lane 3 rAra h 1  
 Lane 4 Secondary antibody control

**Fig. S1: Analysis of natural and recombinant Ara h 1 by SDS-PAGE and Immunoblotting.** (A) SDS-PAGE and Coomassie staining of purified nAra h 1 from peanut, rAra h 1 and rAra h 2. (B) nAra h 1 and rAra h 1 blotted onto nitrocellulose membrane detected using mouse anti-Ara h 1 monoclonal antibody, followed by alkaline phosphatase-conjugated anti-mouse IgG antibodies, MW, Molecular weight marker (kDa).

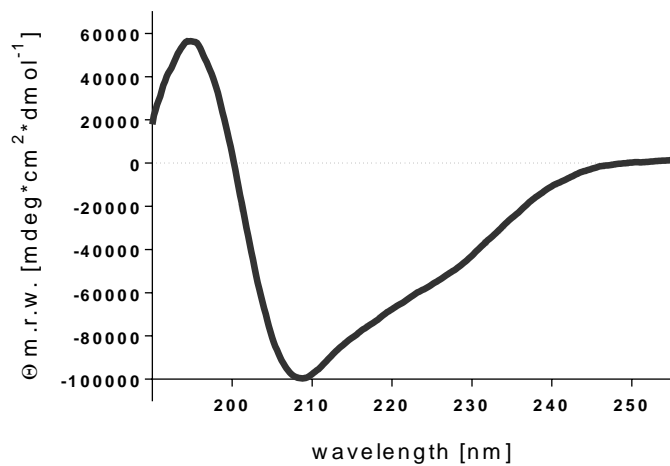

**Fig. S2: CD spectra of recombinant Ara h 1.** CD spectroscopy of rAra h 1 was performed on a J-810S spectropolarimeter (Jasco) with constant nitrogen flushing at 20° C.

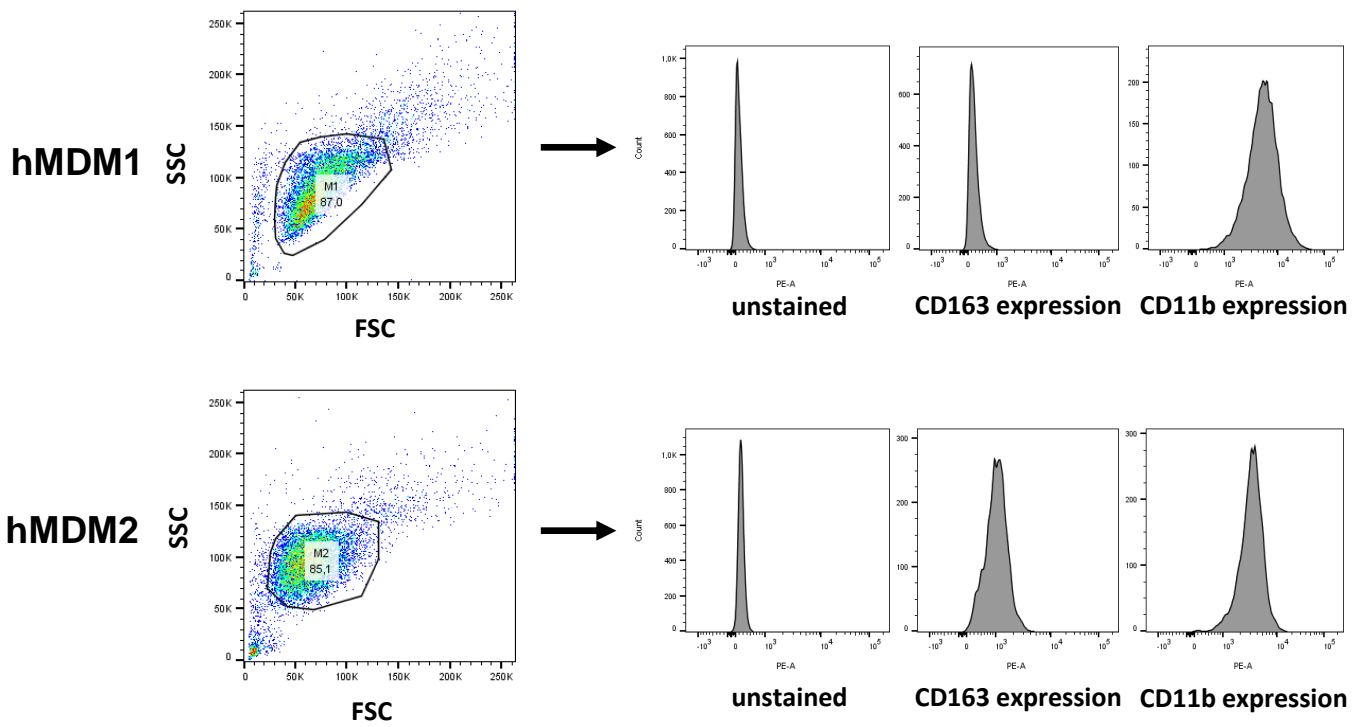

**Fig. S3: Gating strategy in FACS analysis.** The main population of hMDM1 and hMDM2 is CD11b<sup>+</sup>CD163<sup>-</sup> and CD11b<sup>+</sup>CD163<sup>+</sup> cells, respectively.

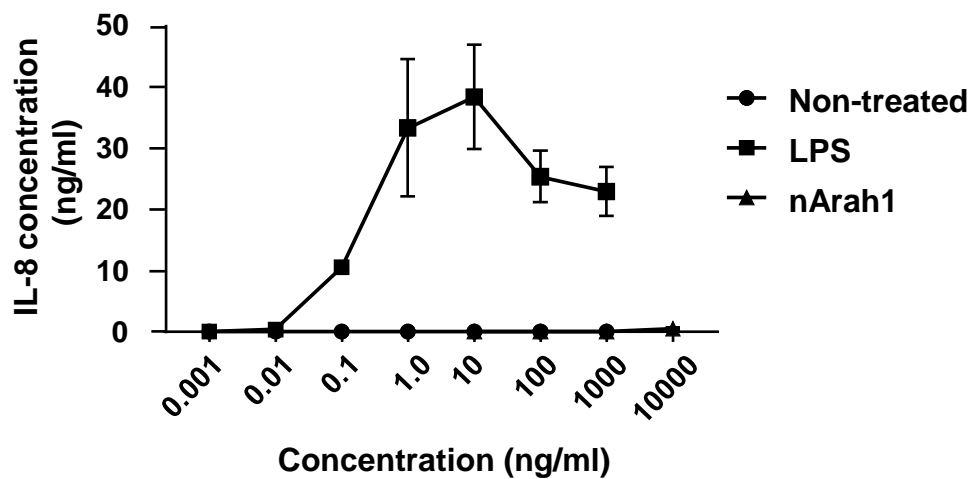

**Fig. S4: nAra h 1 did not bind TLR4.** HEK-Dual™ human TLR4 (NF/IL8) cells were stimulated with 0.001-10000 ng/mL of nAra h 1 or LPS for 20 hours. The concentrations of IL-8 in the culture supernatant were measured by ELISA. The data are representative of two experiments.

## hMDM1

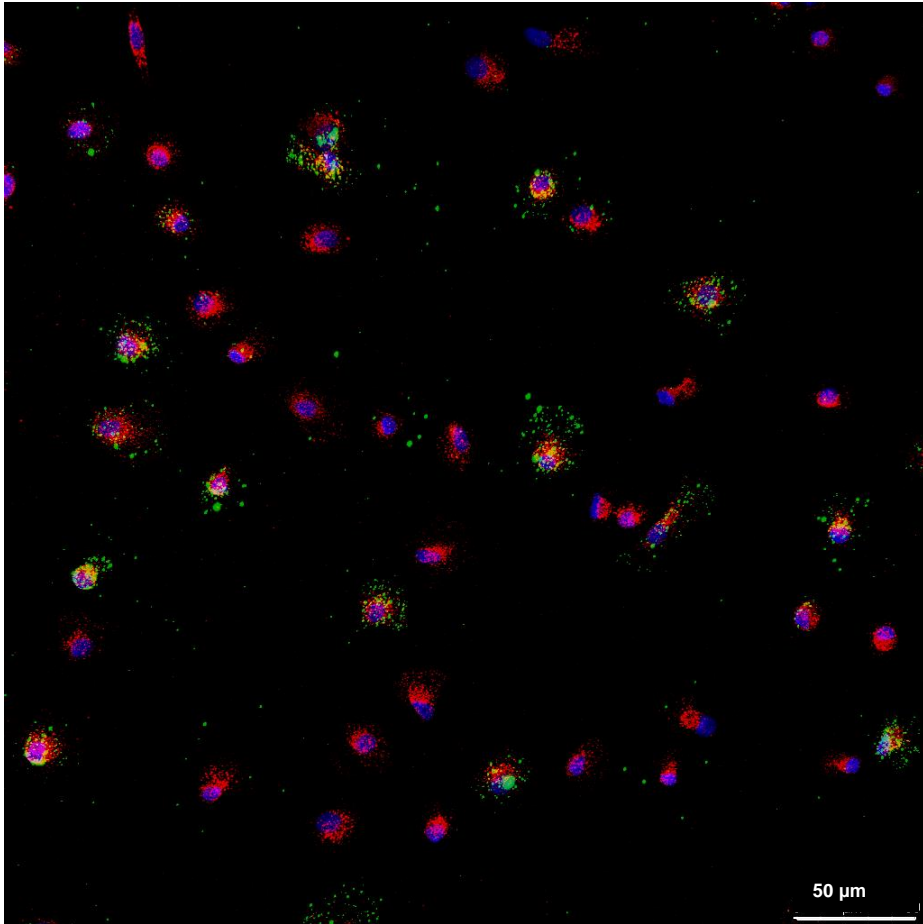

Green: FITC-nAra h 1 Red: EEA1 Blue: DAPI

**Fig. S5: Uptake of FITC-nAra h 1 by hMDM1 in confocal imaging.** hMDM1 were incubated with 10 μg/ml of FITC-nAra h 1 for 15 min. The cells were then blocked with normal goat serum, stained with anti-human EEA1 in combination with Cy3-conjugated goat anti-mouse IgG, F(ab')<sub>2</sub> fragment, and treated with 4',6-diamidino-2-phenylindole. The cell images was obtained by confocal microscopy. Data is representative of two independent experiments using four donors in total.



## hMDM2

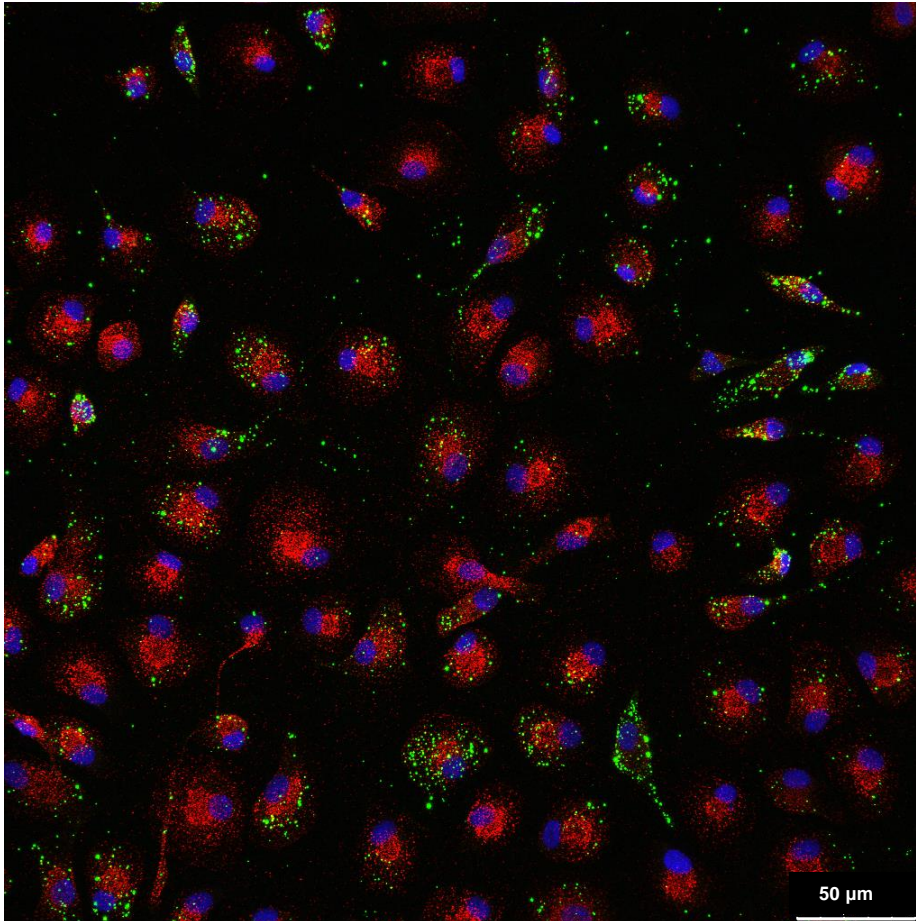

Green: FITC-nAra h 1   Red: EEA1   Blue: DAPI

**Fig. S6: Uptake of FITC-nAra h 1 by hMDM2 in confocal imaging.** hMDM2 were incubated with 10  $\mu\text{g/ml}$  of FITC-nAra h 1 for 15 min. The cells were then blocked with normal goat serum, stained with anti-human EEA1 in combination with Cy3-conjugated goat anti-mouse IgG, F(ab')<sub>2</sub> fragment, and treated with 4',6-diamidino-2-phenylindole. The cell images was obtained by confocal microscopy. Data is representative of two independent experiments using four donors in total.

**A**

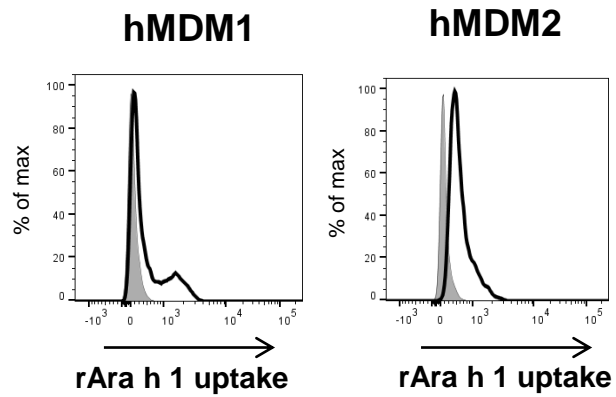

**Fig. S7: Recombinant Ara h 1 was not taken up by macrophages.** hMDM1 and hMDM2 were incubated with 5.0  $\mu\text{g/ml}$  of FITC-conjugated recombinant Ara h 1 (FITC-rAra h 1) for 15 min. The uptake levels of FITC-rAra h 1 by the cells were measured by FACS. Grey areas represent cells cultured without rAra h 1 incubation. The data are representative of two independent experiments using three donors in total.

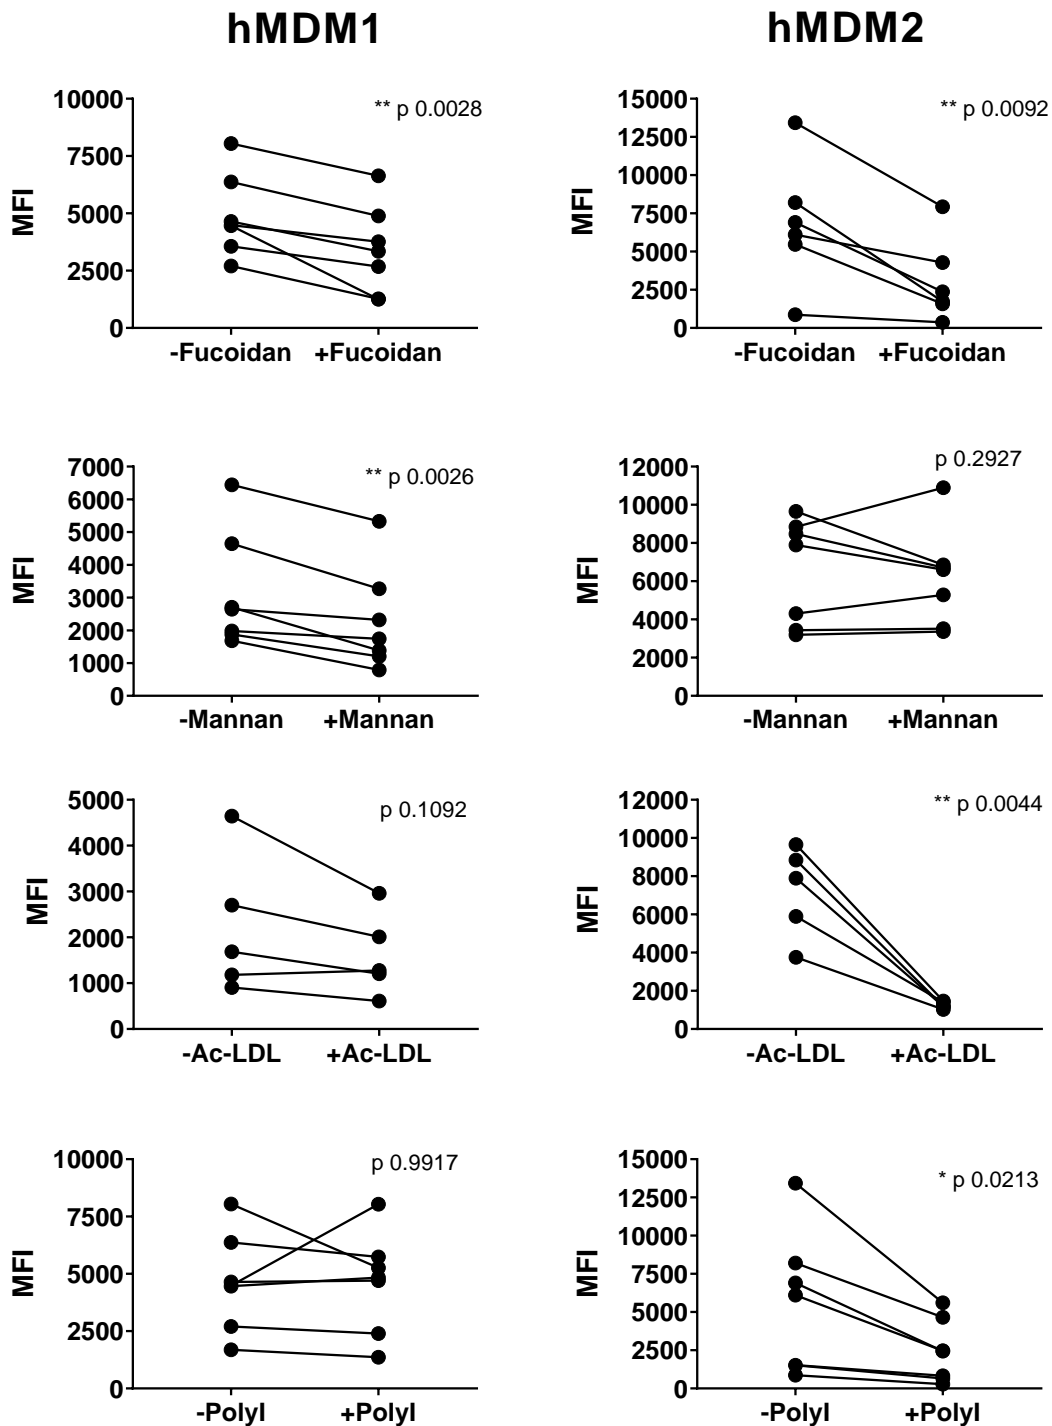

**Fig. S8: SR-AI inhibitor suppressed uptake of nAra h 1 by macrophages.** hMDM1M1 and hMDM2M2 were treated with or without 100 µg/ml of fucoidan, or 10 µg/ml of polyinosinic acid, 200 µg/ml of Acetylated LDL or 200 µg/ml of Mannan for 30 min prior to the incubation with 10 µg/ml of FITC-nAra h 1. The uptake of Ara h 1 by macrophages was assessed by FACS. Each set of symbols connected by a line represents for data from cells of an individual donor. The data were collected from three independent experiments using five to seven donors in total.

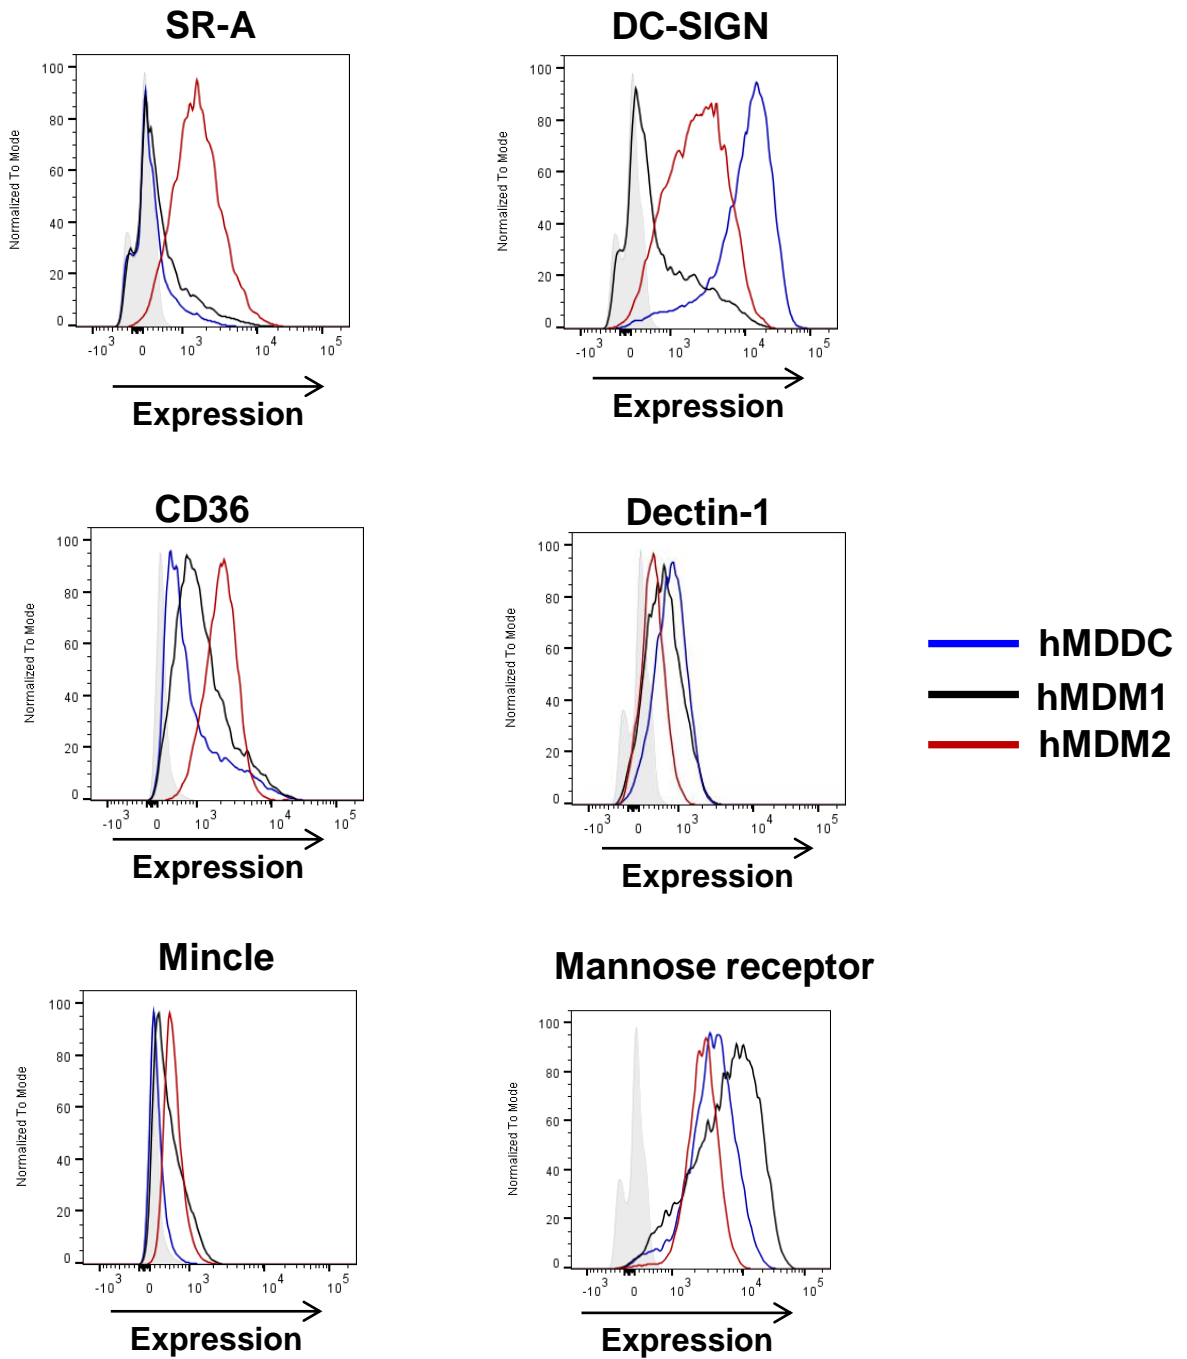

**Figure S9: Receptor expression in hMDDC, hMDM1 and hMDM2.** The expression levels of receptors on the cell surface of hMDDC, hMDM1 and hMDM2 were assessed by FACS. The gray area represent non-stained cells. The figure shows data of cells generated from one doner. The experiment repeated twice using two doner in total.
